# Supplementary material
Source: PubMed Central journal article supplement (PMC9891349)
Supplement: NIHMS1868561-supplement-Supplemental_Figure_S1_to_S9.pdf [file NIHMS1868561-supplement-Supplemental_Figure_S1_to_S9.pdf]

# A robust vasculogenic microfluidic model using human immortalized endothelial cells and Thy1 positive fibroblasts

Zhengpeng Wan<sup>1,2,#</sup>, Shun Zhang<sup>1,#</sup>, Amy X. Zhong<sup>1</sup>, Sarah E. Shelton<sup>1,2</sup>, Marco Campisi<sup>2,3</sup>, Shriram K Sundararaman<sup>2</sup>, Giovanni S. Offeddu<sup>1</sup>, Eunkyung Ko<sup>4</sup>, Lina Ibrahim<sup>4</sup>, Mark F. Coughlin<sup>1</sup>, Tiankun Liu<sup>1,5</sup>, Jing Bai<sup>1</sup>, David A. Barbie<sup>2,\*</sup>, Roger D. Kamm<sup>1,4,\*</sup>

## Supplemental Figures

**Figure S1:**

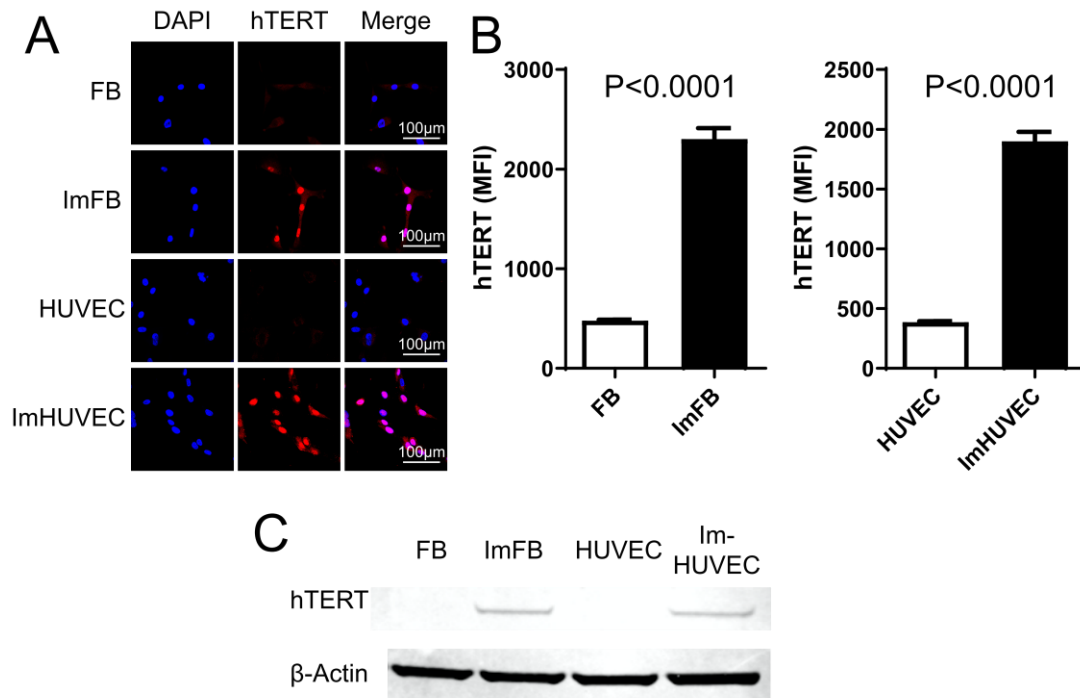

**Figure S1: Expression of hTERT in FBs, ImFBs, HUVECs and ImHUVECs.**

- (A) Representative confocal images of nucleus (DAPI, in blue) and hTERT (red) staining in FBs, ImFBs, HUVECs and ImHUVECs. Scale bar is 100 μm.
- (B) Statistical quantification for the mean fluorescent intensity (MFI) of hTERT in FBs, ImFBs, HUVECs and ImHUVECs. Bars represent mean ± SD. Two-tailed *t* tests were performed for the statistical comparisons.
- (C) hTERT detection in FBs, ImFBs, HUVECs and ImHUVECs by western blot.

**Figure S2:**

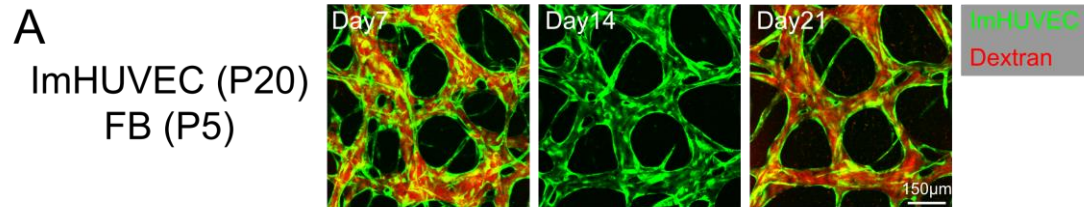

**Figure S2:  $\mu$ VNs made of ImHUEVCs from P20 with ImFBs from P5 remain perfusable over 3 weeks.**

(A) Representative images of  $\mu$ VNs made of ImHUEVCs (green) from passage 20 (P20) and ImFBs from passage 5 (P5) at the same location on day 7, 14 (did not perform dextran perfusion experiment), and 21.  $\mu$ VNs are perfused with 70 kDa MW Texas Red dextran (red).

**Figure S3:**

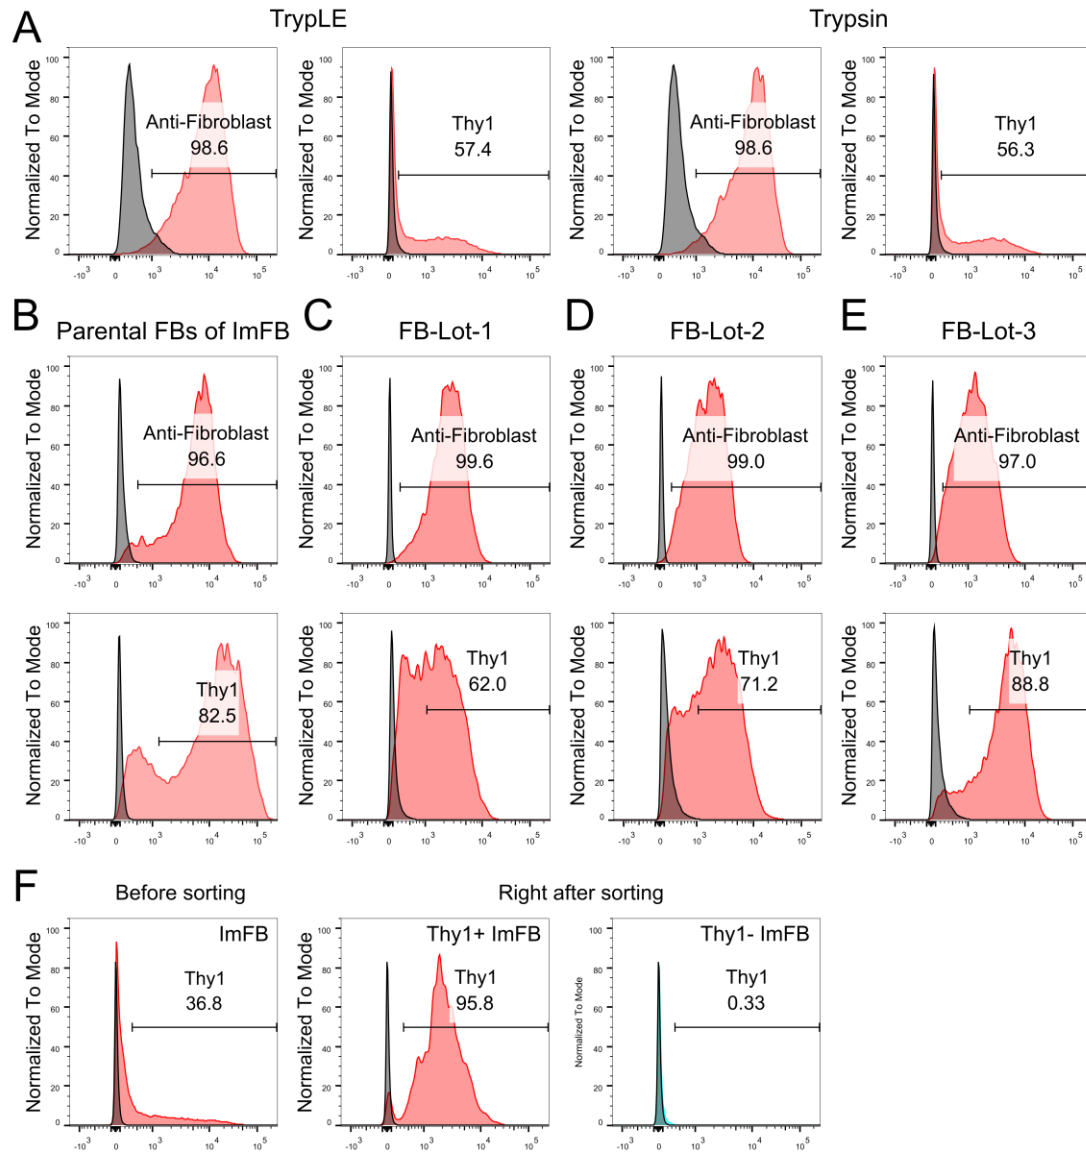

**Figure S3: Evaluation of anti-Fibroblast and Thy1 expression in FBs from different experimental conditions.**

(A) FACS measurement of anti-Fibroblast and Thy1 in FBs detached by TrypLE (left) or Trypsin (right).

(B-E) Representative histograms showing the anti-Fibroblast (top) and Thy1 (bottom) expression in parental FBs of ImFBs (B), and FBs from different lot numbers. (C-E).

**(F)** Representative histograms of anti-Fibroblast and Thy1 expression in ImFBs before and right after Thy1 based cell sorting.

**Figure S4:**

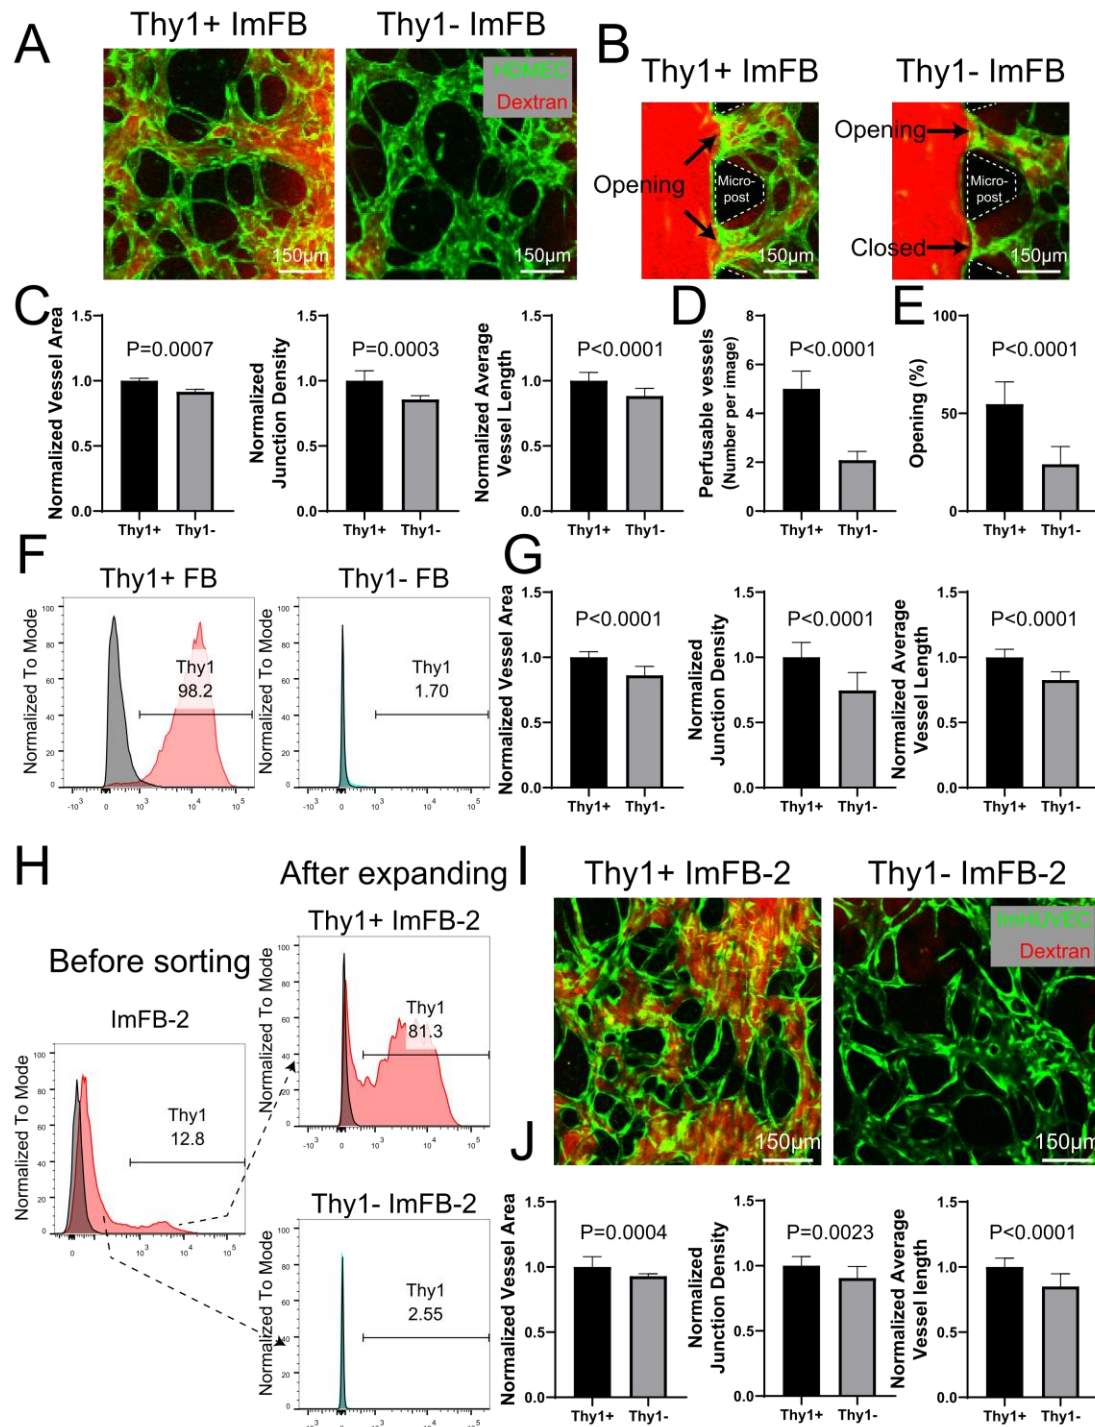

**Figure S4: Thy1+ FBs promote better  $\mu$ VN formation than Thy1- FBs.**

(A) Representative images of  $\mu$ VNs made of human dermal microvascular endothelial cells (HDMEC) with Thy1+ ImFBs or Thy1- ImFBs. Green,

HDMEC. Red, dextran. Scale bar is 150  $\mu\text{m}$ .

- (B)** Representative images of dermal  $\mu\text{VNs}$  formed with Thy1+ or Thy1- ImFBs at the gap regions between microposts. Arrows point out the microvessel openings and closed structure. Green, HDMEC. Red, dextran. Scale bar is 150  $\mu\text{m}$ .
- (C)** Statistical analysis of normalized vessel area (left), junction density (middle), and average vessel length (right) of dermal  $\mu\text{VNs}$  formed with Thy1+ ImFBs or Thy1- ImFBs.
- (D-E)** Quantification of the number of perfusable microvessels in each image **(D)** and the percentage of the openings at the gap regions between microposts in each device **(E)**.
- (F)** Representative histograms showing Thy1 expression in Thy1+ primary FBs and Thy1- primary FBs after sorting.
- (G)** Statistical analysis of normalized vessel area (left), junction density (middle), and average vessel length (right) of  $\mu\text{VNs}$  made of ImHUVECs with Thy1+ or Thy1- primary FBs.
- (H)** FACS measurements of Thy1 in ImFBs made from another batch of FBs (ImFB-2) before sorting (left) and after expanding the sorted Thy1+ (top right) and Thy1- (bottom right) cells.
- (I)** Representative images of  $\mu\text{VNs}$  made of ImHUVECs with Thy1+ ImFB-2 or Thy1- ImFB-2. Green, HDMEC. Red, dextran. Scale bar is 150  $\mu\text{m}$ .
- (J)** Statistical analysis of normalized vessel area (left), junction density (middle), and average vessel length (right) of  $\mu\text{VNs}$  formed with Thy1+ ImFB-2 or Thy1- ImFB-2.

Bars represent mean  $\pm$  SD. Two-tailed *t* tests were performed for the statistical comparisons.

**Figure S5:**

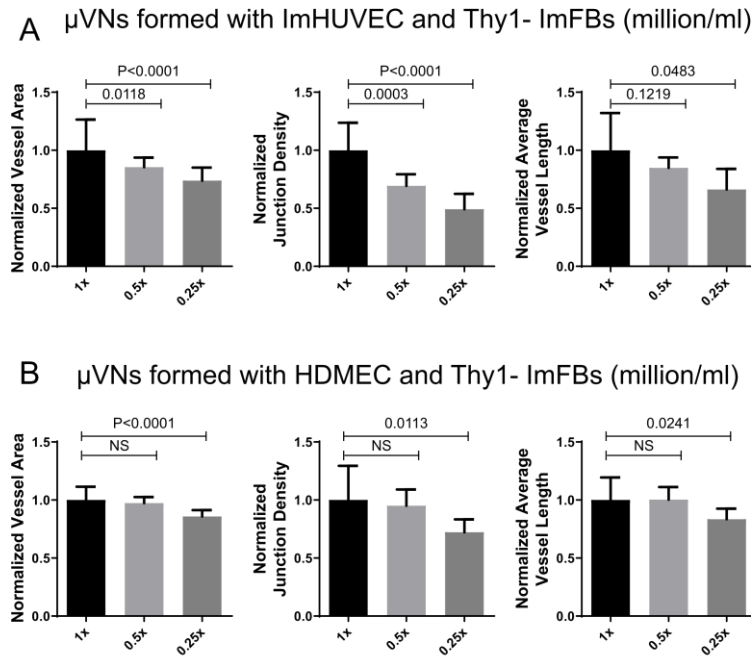

**Figure S5: Reducing seeding density of Thy1- ImFBs cannot rescue the defective  $\mu$ VNs.**

**(A-B)** Statistical analysis of normalized vessel area (left), junction density (middle), and average vessel length (right) of  $\mu$ VNs made of ImHUEC **(A)** or HDMEC **(B)** with Thy1- ImFBs at different seeding density.

Bars represent mean  $\pm$  SD. Two-tailed  $t$  tests were performed for the statistical comparisons.

**Figure S6:**

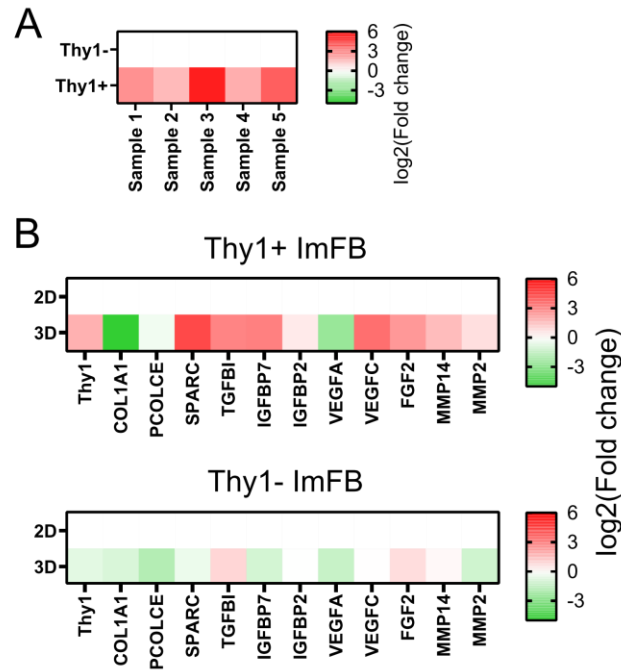

**Figure S6: Expression of angiogenic and lumen formation factors in FBs.**

- (A) Heatmap of RT-PCR results of IGFBP2 expression in Thy1+ and Thy1- ImFBs or primary FBs from different samples cultured in 2D. Fold change was relative to Thy1- ImFBs or primary FBs of each sample.
- (B) Heatmap of RT-PCR results of genes involved in lumen formation and angiogenesis in Thy1+ ImFBs (top) and Thy1- ImFBs (bottom) cultured in 2D or 3D. Fold change was relative to 2D data of each sample.

**Figure S7:**

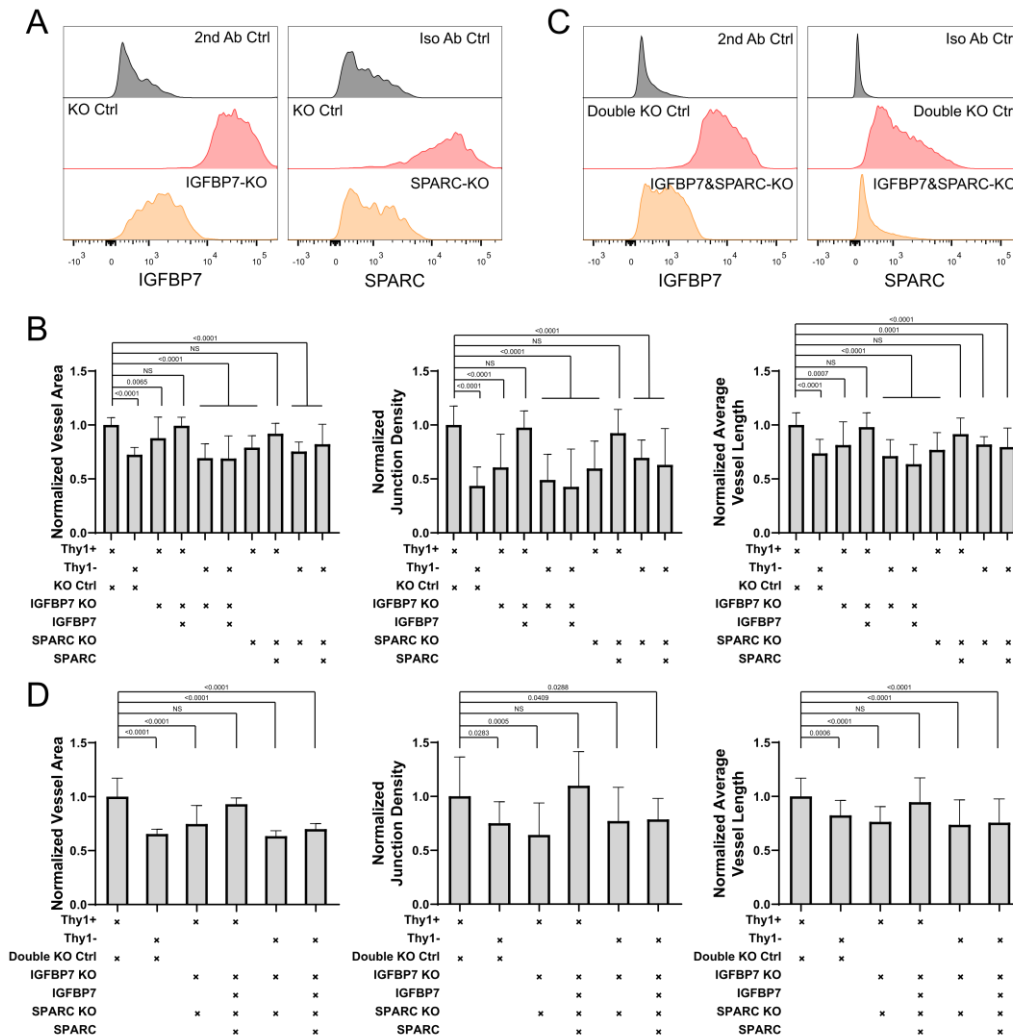

**Figure S7: IGFBP7 and SPARC are required for  $\mu$ VN formation.**

- (A) Representative histograms showing IGFBP7 (left) or SPARC (right) expression in KO control ImFBs and IGFBP7 KO ImFBs, or SPARC KO ImFBs, respectively.
- (B) Statistical analysis of normalized vessel area (left), junction density (middle), and average vessel length (right) of  $\mu$ VNs made of ImHUEVCs with Thy1+ or Thy1- KO control ImFBs, IGFBP7 KO ImFBs, or SPARC KO ImFBs.
- (C) Representative histograms showing IGFBP7 (left) or SPARC (right) expression in double KO control ImFBs and IGFBP7 and SPARC double KO ImFBs.
- (D) Statistical analysis of normalized vessel area (left), junction density (middle),

and average vessel length (right) of  $\mu$ VNs made of ImHUEVCs with Thy1+ or Thy1- double KO control ImFBs, IGFBP7 and SPARC double KO ImFBs. Bars represent mean  $\pm$  SD. Two-tailed  $t$  tests were performed for the statistical comparisons.

**Figure S8:**

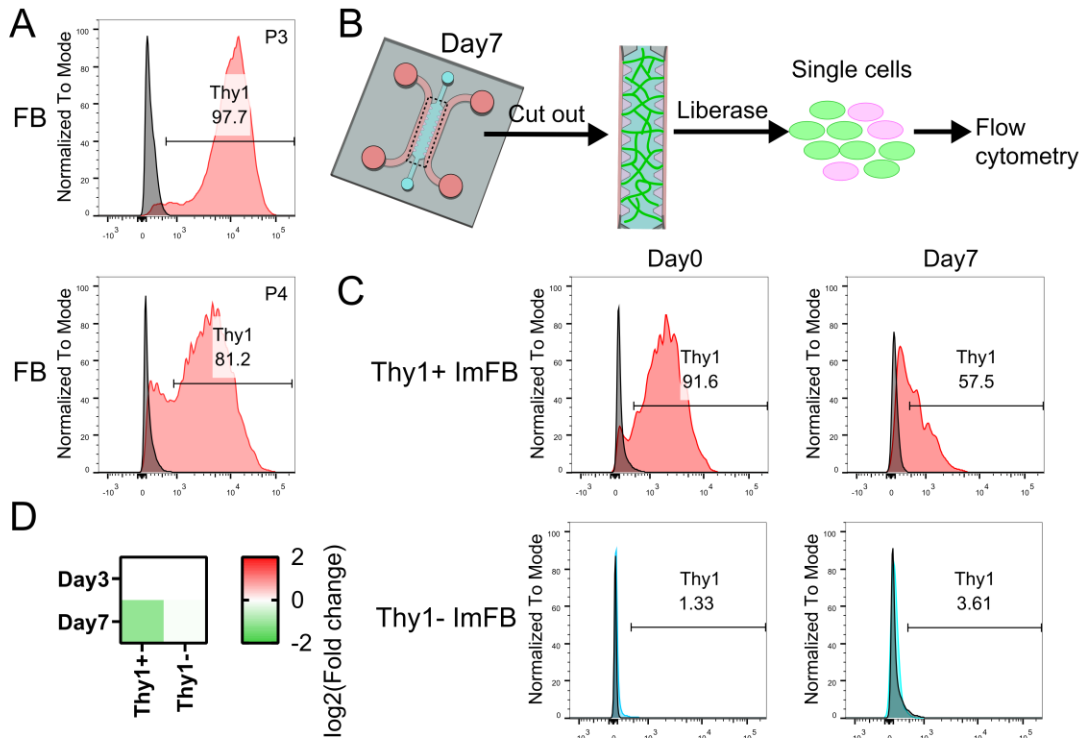

**Figure S8: Thy1 expression in FBs decreased when expanding in both 2D and 3D.**

- (A) Representative histograms showing Thy1 expression in FBs from P3 (top) and P4 (bottom).
- (B) Schematic representation of the flow cytometry procedure to run from  $\mu$ VNs. Gel channels containing cells were cut out from the device, and further treated with Liberase to dissociate single cells from matrix.
- (C) Representative histograms showing Thy1 expression in Thy1+ ImFBs and Thy1- ImFBs on day 0 and day 7.
- (D) Heatmap of RT-PCR results of Thy1 expression in Thy1+ and Thy1- ImFBs cultured in 3D fibrin gel for 3 days and 7 days. Fold change was relative to day 3 data of each sample.

**Figure S9:**

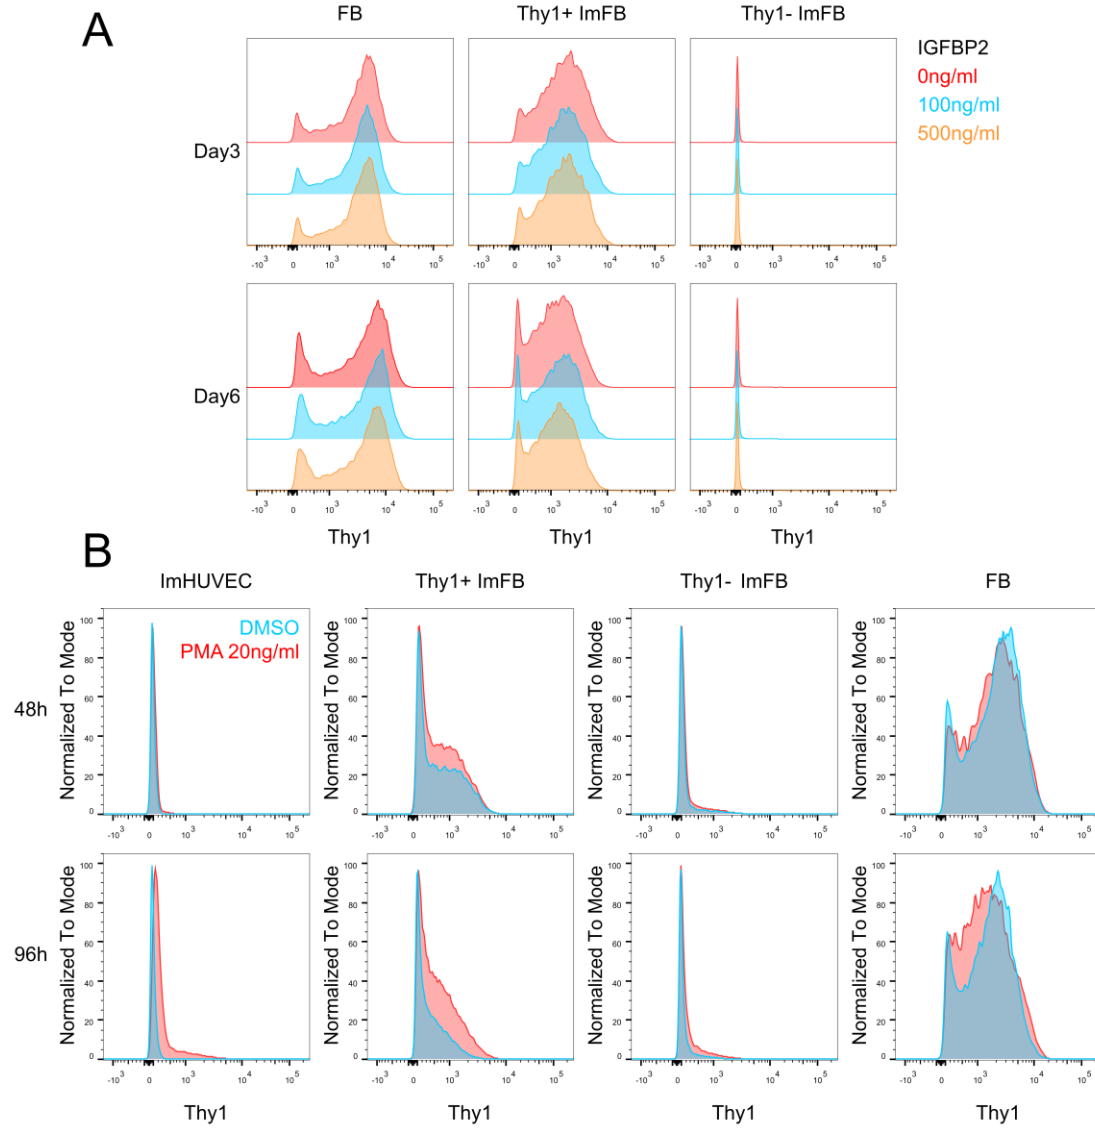

**Figure S9: Thy1 expression in FBs treated with IGFBP2 or PMA.**

- (A) Representative histograms showing Thy1 expression in FBs (left), Thy1+ ImFBs (middle), and Thy1- ImFBs (right) treated with IGFBP2 at 0, 100, or 500 ng/ml for 3 days (top) or 6 days (bottom).
- (B) Representative histograms showing Thy1 expression in ImHUVCEs (far left), Thy1+ ImFBs (left), Thy1- ImFBs (right), and FBs (far right) treated with DMSO or PMA for 48h (top) or 96h (bottom).
